# Supplementary material for: Understanding patient preference in prosthetic ankle stiffness
Source: PubMed Central journal article supplement (PMC8390224; doi:10.1186/s12984-021-00916-1), 2021-08-25
Supplement: 12984_2021_916_MOESM1_ESM.pdf [file 12984_2021_916_MOESM1_ESM.pdf]

**Table S1. Secondary biomechanical descriptors and their trends with stiffness.** Following completion of the primary analyses detailed in Table 1, seventy-two additional secondary descriptors were evaluated for first- and second-order fit with preference-normalized VSPA stiffness. This additional analysis was performed for completeness, to avoid missing any potential underlying trends; as such, these secondary descriptors are extensions of the primary descriptors to all joints of the affected and unaffected limbs. The table shows  $p$ -values for the linear ( $p_L$ ) and quadratic ( $p_Q$ ) terms of the LMEM fit to each descriptor. For descriptors with  $p_Q < 0.05$ , the lower ( $v_{lb}$ ) and upper ( $v_{ub}$ ) bounds on the 95% CI for the vertex stiffness (percent deviation from preferred) are also shown. \* indicates significance at the  $\alpha = 0.05$  level (Bonferroni correction for 97 total primary and secondary hypotheses).

|             | $p_L$                                         | $p_Q$  | $v_{lb}$ | $v_{ub}$ |   |
|-------------|-----------------------------------------------|--------|----------|----------|---|
| <b>Hip</b>  | Cross-leg diff. in hip ROM                    | 0.227  | 0.361    | —        | — |
|             | Cross-leg diff. in hip ROM                    | 0.227  | 0.361    | —        | — |
|             | Cross-leg diff. in peak hip ext. moment       | 0.534  | 0.990    | —        | — |
|             | Cross-leg diff. in peak hip flex. moment      | 0.001  | 0.918    | —        | — |
|             | Cross-leg diff. in peak hip power             | 0.530  | 0.454    | —        | — |
|             | Cross-leg diff. in min. hip power             | 0.440  | 0.607    | —        | — |
|             | Cross-leg RMS diff. hip power                 | 0.299  | 0.597    | —        | — |
|             | Affected hip peak ext. angle                  | 0.515  | 0.412    | —        | — |
|             | Unaffected hip peak ext. angle                | 7e-6*  | 0.719    | —        | — |
|             | Affected hip peak ext. moment                 | 0.938  | 0.904    | —        | — |
|             | Unaffected hip peak ext. moment               | 0.041  | 0.910    | —        | — |
|             | Affected hip peak power                       | 0.202  | 0.354    | —        | — |
|             | Unaffected hip peak power                     | 0.018  | 0.925    | —        | — |
|             | Unaffected hip peak early ext. moment         | 0.274  | 0.258    | —        | — |
|             | Affected hip peak early ext. moment           | 0.913  | 0.951    | —        | — |
|             | Affected hip peak flex. angle                 | 4e-4*  | 0.553    | —        | — |
|             | Unaffected hip peak flex. angle               | 0.758  | 0.855    | —        | — |
|             | Affected hip peak flex. moment                | 0.105  | 0.977    | —        | — |
|             | Unaffected hip peak flex. moment              | 0.012  | 0.246    | —        | — |
|             | Affected hip min. power                       | 0.481  | 0.995    | —        | — |
|             | Unaffected hip min. power                     | 0.258  | 0.410    | —        | — |
|             | Affected hip peak early flex. angle           | 4e-10* | 0.853    | —        | — |
|             | Unaffected hip peak early flex. angle         | 0.307  | 0.982    | —        | — |
|             | Cross-leg diff. in peak early hip flex. angle | 0.573  | 0.588    | —        | — |
|             | Affected hip ROM                              | 3e-4*  | 0.985    | —        | — |
|             | Unaffected hip ROM                            | 4e-4*  | 0.700    | —        | — |
|             | Affected hip moment range                     | 0.456  | 0.955    | —        | — |
|             | Unaffected hip moment range                   | 0.001  | 0.408    | —        | — |
|             | Affected hip power range                      | 0.514  | 0.507    | —        | — |
|             | Unaffected hip power range                    | 0.062  | 0.551    | —        | — |
| <b>Knee</b> | Cross-leg diff. in knee ROM                   | 0.030  | 0.422    | —        | — |
|             | Cross-leg diff. in peak knee flex. moment     | 0.177  | 0.060    | —        | — |
|             | Cross-leg RMS diff. knee power                | 0.001* | 0.092    | —        | — |
|             | Affected knee peak ext. angle                 | 8e-12* | 0.819    | —        | — |

|              |                                                |        |       |      |       |
|--------------|------------------------------------------------|--------|-------|------|-------|
|              | Unaffected knee peak ext. angle                | 0.104  | 0.685 | —    | —     |
|              | Unaffected knee peak ext. moment               | 1e-4*  | 0.010 | 2.8  | 51.7  |
|              | Affected knee peak power                       | 5e-6*  | 0.535 | —    | —     |
|              | Unaffected knee peak power                     | 3e-7*  | 0.083 | —    | —     |
|              | Affected knee peak early ext. moment           | 1e-4*  | 0.485 | —    | —     |
|              | Affected knee peak flex. angle                 | 2e-17* | 0.258 | —    | —     |
|              | Unaffected knee peak flex. angle               | 0.136  | 0.856 | —    | —     |
|              | Unaffected knee peak flex. moment              | 0.352  | 0.584 | —    | —     |
|              | Affected knee min. power                       | 0.066  | 0.797 | —    | —     |
|              | Unaffected knee min. power                     | 0.001  | 0.169 | —    | —     |
|              | Affected knee peak early flex. angle           | 0.001  | 0.648 | —    | —     |
|              | Unaffected knee peak early flex. angle         | 6e-4*  | 0.426 | —    | —     |
|              | Cross-leg diff. in peak early knee flex. angle | 0.002  | 0.495 | —    | —     |
|              | Affected knee moment range                     | 0.001  | 0.842 | —    | —     |
|              | Unaffected knee moment range                   | 0.003  | 0.005 | 1.0  | 37.0  |
|              | Affected knee power range                      | 0.451  | 0.993 | —    | —     |
|              | Unaffected knee power range                    | 4e-6   | 0.075 | —    | —     |
|              | Cross-leg diff. in ankle ROM                   | 4e-20* | 0.492 | —    | —     |
|              | Cross-leg diff. in peak ankle DF moment        | 0.309  | 0.823 | —    | —     |
|              | Cross-leg diff. in min. ankle power            | 0.210  | 0.175 | —    | —     |
|              | Cross-leg RMS diff. ankle power                | 1e-6*  | 0.094 | —    | —     |
|              | Unaffected ankle peak DF angle                 | 0.064  | 0.910 | —    | —     |
|              | Affected ankle peak DF moment                  | 0.571  | 0.818 | —    | —     |
|              | Unaffected ankle peak DF moment                | 2e-7*  | 0.069 | —    | —     |
|              | Unaffected ankle peak power                    | 0.875  | 0.492 | —    | —     |
|              | Unaffected ankle peak early DF moment          | 6e-8*  | 0.091 | —    | —     |
|              | Affected ankle peak early DF moment            | 0.609  | 0.841 | —    | —     |
| <b>Ankle</b> | Affected ankle peak PF angle                   | 3e-24* | 0.025 | 13.6 | 200   |
|              | Unaffected ankle peak PF angle                 | 0.417  | 0.910 | —    | —     |
|              | Affected ankle min. power                      | 2e-16* | 0.340 | —    | —     |
|              | Unaffected ankle min. power                    | 0.588  | 0.945 | —    | —     |
|              | Affected ankle peak early PF angle             | 2e-23* | 0.031 | 9.7  | 207.1 |
|              | Unaffected ankle peak early PF angle           | 0.312  | 0.599 | —    | —     |
|              | Cross-leg diff. in peak early ankle PF angle   | 0.852  | 0.223 | —    | —     |
|              | Affected ankle moment range                    | 5e-5*  | 0.161 | —    | —     |
|              | Unaffected ankle moment range                  | 0.188  | 0.617 | —    | —     |
|              | Affected ankle power range                     | 3e-19* | 0.284 | —    | —     |
|              | Unaffected ankle power range                   | 0.830  | 0.533 | —    | —     |
